# Supplementary material for: A sub-4 nm PtCu3 intermetallic catalyst with an L12-ordered structure toward efficient activity and durability for oxygen reduction
Source: Royal Society of Chemistry journal article supplement (doi:10.1039/d3ta07406d), 2024-01-01
Supplement: d3ta07406d1.pdf [file d3ta07406d1.pdf]

## Electronic Supplementary Information

### **Sub-4 nm PtCu<sub>3</sub> intermetallic catalyst with L1<sub>2</sub>-ordered structure toward efficient activity and durability for oxygen reduction**

*Haibo Jiang,<sup>a</sup> Xiang Xie,<sup>a</sup> Liyuan Bi,<sup>a</sup> Shengwei Yu,<sup>b</sup> Jiayi Zeng,<sup>a</sup> Lili Zhang,<sup>a</sup> Jianhua Shen<sup>\*a</sup> and Chunzhong Li<sup>\*b</sup>*

a.) Shanghai Engineering Research Center of Hierarchical Nanomaterials, Key Laboratory for Ultrafine Materials of Ministry of Education, School of Materials Science and Engineering, East China University of Science & Technology; Shanghai 200237, China

b.) School of Chemical Engineering, East China University of Science and Technology, Shanghai 200237, China.

\*) Corresponding author.

E-mail address: jianhuashen@ecust.edu.cn; czli@ecust.edu.cn

## Experimental section

### Chemicals:

Chloroplatinic acid hexahydrate ( $\text{H}_2\text{PtCl}_6 \cdot 6\text{H}_2\text{O}$ , AR, 37.5wt%), Copper(II) chloride hexahydrate ( $\text{CuCl}_2 \cdot 6\text{H}_2\text{O}$ , AR, 99wt%) and urea ( $(\text{NH}_2)_2\text{CO}$ , AR, 99.5wt%) were purchased from Aladdin. 20 wt% Pt/C was purchased from Shanghai Hesin Electric. Vulcan XC-72 was purchased from Macklin. All chemicals were used as received and not further purified.

### Synthesis of $\text{L1}_2\text{-PtCu}_3/\text{C}$ catalyst

In a typical synthesis, 35 mg of urea, 30 mg of carbon black (Vulcan XC-72), 1.68 mL of  $\text{H}_2\text{PtCl}_6 \cdot 6\text{H}_2\text{O}$  (10 mg/mL) with 25.6 mg of  $\text{CuCl}_2 \cdot 2\text{H}_2\text{O}$  were sonicated for 1 h to obtain a homogeneously dispersed black suspension. The suspension was flash frozen in liquid nitrogen and freeze dried overnight to obtain a dry solid black powder. The dried powder was then held in a tube furnace with the formation gas (5% hydrogen + 95% argon) at an elevated temperature rate of  $10^\circ\text{C}/\text{min}$  up to  $550^\circ\text{C}$  for 2 h. To induce ordered transitions of the atoms at high temperatures, the furnace chamber was heated to  $850^\circ\text{C}$  at a ramp rate of  $5^\circ\text{C}/\text{min}$  for 2 h. After natural cooling to room temperature in the furnace chamber, the black solid powder was extracted, then washed several times with deionized water and heated at  $60^\circ\text{C}$  for 8 hours in a vacuum oven to obtain  $\text{L1}_2\text{-PtCu}_3/\text{C}$  catalyst.

### Synthesis of $\text{N-PtCu}_3/\text{C}$ catalyst

The synthesis conditions were consistent with those of  $\text{L1}_2\text{-PtCu}_3$  except that no urea was added to the precursor.

### Materials characterization

The X-ray diffraction patterns of catalyst particles were collected on a D8 ADVANCE (Bruker, Germany) diffractometer in  $\text{Cu K}_\alpha$  radiation ( $\lambda = 1.5406 \text{ \AA}$ ) to determine the crystal structure and particle size. The operation voltage and current were

40 kV and 20 mA, respectively. The microstructure was analyzed using transmission electron microscopy (TEM) and high-resolution transmission electron microscopy (HRTEM) to analyze the micro-morphology operation by the JEOL-2100 experimental setup with LaB<sub>6</sub> cathode at 200 kV. High angle annular dark field scanning transmission electron (HAADF-STEM) imaging was performed on a Grand ARM 300F connected to an energy-dispersive X-ray spectroscopy (EDX). Inductively coupled plasma-atomic emission spectroscopy (ICP-AES) was manipulated to assess the concentration of the catalyst on Agilent 725ES. X-ray photoelectron spectroscopy (XPS) measurements were carried out using K-Alpha Plus (Somerfield, USA) with Al-Ka X-ray as the illuminant to Obtain the electronic structure and elemental composition of catalyst surfaces.

### **Electrochemical tests**

All electrochemical measurements were operated in a standard three-electrode system. The glassy carbon electrode was mounted on a rotating disk electrode as the working electrode (5 mm in diameter), a saturated calomel electrode as the reference electrode, and a carbon rod as the counter electrode. Catalyst ink was obtained by dispersing 5 mg of catalyst powder in a mixture of 960  $\mu$ L of isopropanol and 40  $\mu$ L of Nafion (5 wt.%) and sonicated for 1 h. The catalyst film was obtained by depositing 4  $\mu$ L of ultrasonically homogeneous catalyst ink on the glassy carbon electrode and drying naturally at room temperature. cyclic voltammetry curves were recorded in a 0.1 M HClO<sub>4</sub> aqueous solution passed through Ar at least 30 min with a potential interval of 0.06 V-1.3 V (vs RHE) and a scan rate of 100 mV s<sup>-1</sup>. ORR polarization curves were recorded in 0.1 M HClO<sub>4</sub> solution saturated with O<sub>2</sub> using linear scanning voltammetry curves at 1600 rpm and a scan rate of 10 mV s<sup>-1</sup>. Accelerated durability tests were performed in oxygen-saturated 0.1 M HClO<sub>4</sub> solution with a potential interval of 0.6-1.1 V (vs RHE) and a scan rate of 100 mV s<sup>-1</sup>.

The ECSAs are determined from charges associated with underpotentially deposited H (H<sub>upd</sub>). The electrochemical surface area of the catalyst is obtained from the following equation:

$$ECSA = \frac{Q_H}{C \times m_{Pt}} = \frac{S_H/v}{C \times m_{Pt}}$$

where  $Q_H$  is the charge consumed by the reaction ( $C \text{ m}^{-2}$ ),  $C$  is the charge value of hydrogen adsorbed on the Pt surface in the monolayer ( $210 \times 10^{-2} \mu C \text{ cm}^{-2}$ ),  $S_H$  is the area of the H desorption area after subtracting the effect of the bilayer ( $V \cdot mA$ ),  $v$  is the scanning cycle rate ( $V \text{ s}^{-1}$ ) and  $m_{Pt}$  is the actual loading of Pt on the surface of the glassy carbon electrode ( $0.196 \text{ cm}^{-2}$ ). The integral area of the H desorption peak ( $Q_H$ ) of the catalyst can be obtained from the cyclic voltammetry curve in the potential interval of 0.05 - 0.4 V vs. RHE.<sup>1</sup> The mass percentage of Pt in  $L1_2\text{-PtCu}_3$  is measured by ICP-AES to be 16.85% with commercial Pt/C of 20.02%. Therefore, the actual loading ( $m_{Pt}$ ) on the surface of the glassy carbon electrode is 3.37  $\mu g$  and 4  $\mu g$ , respectively.

The Koutecky-Levich equation was used to calculate the ORR kinetic currents:

$$\frac{1}{j_k} = \frac{1}{j_L} - \frac{1}{j} = \frac{1}{Bw^{1/2}} - \frac{1}{j}$$

where  $j_k$ ,  $j_L$ , and  $j$  represent kinetic current density, limiting diffusion current density, and experimentally measured current density, respectively.  $B$  is a constant and  $w$  is the electrode rotation rate.

### Density functional theory method

The first-principles density functional theory (DFT) calculations were performed in the Dmol3 code. Electron exchange and associated energies are described based on the generalized gradient approximation Perdew-Burke-Ernzerhof (GGA-PBE) generalization. Two numerical basis sets and the polarization function (DNP) are used to expand valence electrons, and the relativistic effect is simulated by DFT semi-core pseudopotential. Based on the image results of HAADF-STEM, the PtCu alloy covering two Pt atomic layers is modeled as the structure of  $L1_2\text{-PtCu}_3$  with the pure Pt (111) as the reference. Simulations were carried out using a four-layer periodic cell, with the bottom two layers replacing the Cu atoms periodically with Pt atoms in the ratio Pt: Cu = 1:3, followed by cell structure optimization. The bottom two layers of

atoms are held in place, relaxing the rest. The Pt (100) surface was built to simulate L1<sub>2</sub>-PtCu<sub>3</sub> with a two-layer Pt skin, and the vacuum layer was defined to be 10Å.

The oxygen reduction reaction involves the chemical adsorption of molecular O<sub>2</sub> on the catalyst surface and a four-electron transfer step of three oxygen-containing intermediates<sup>2, 3</sup>:

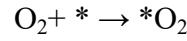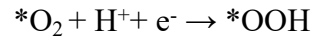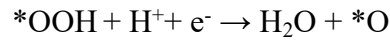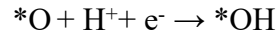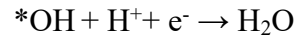

\* is considered to be an adsorption site on the catalyst surface.

The adsorption energy of the oxygen-containing intermediate was calculated by the following equation:

$$\Delta E(* \text{OOH}) = E(* \text{OOH}) - E(*) - [2E(\text{H}_2\text{O}) - 1.5E(\text{H}_2)]$$

$$\Delta E(* \text{O}) = E(* \text{O}) - E(*) - [2E(\text{H}_2\text{O}) - E(\text{H}_2)]$$

$$\Delta E(* \text{OH}) = E(* \text{OH}) - E(*) - [2E(\text{H}_2\text{O}) - 0.5E(\text{H}_2)]$$

The value of Gibbs free energy change for the oxygen-containing intermediate at a given potential is calculated by the following equation:

$$\Delta G(* \text{OOH}) = \Delta E(* \text{OOH}) + \Delta \text{ZPE}(* \text{OOH}) - \Delta \text{TS}(* \text{OOH}) - 3\text{eU} + 3\Delta G(\text{ph})$$

$$\Delta G(* \text{O}) = \Delta E(* \text{O}) + \Delta \text{ZPE}(* \text{O}) - \Delta \text{TS}(* \text{O}) - 2\text{eU} + 2\Delta G(\text{ph})$$

$$\Delta G4 (* \text{OH}) = \Delta E(* \text{OH}) + \Delta \text{ZPE}(* \text{OH}) - \Delta \text{TS}(* \text{OH}) - \text{eU} + \Delta G(\text{ph})$$

The value of Gibbs free energy change for each step at a given potential is calculated by the following equation:

$$\Delta G1 = \Delta G(* \text{OOH}) - 4(1.23 - \text{eU})$$

$$\Delta G2 = \Delta G(* \text{O}) - \Delta G(* \text{O})$$

$$\Delta G_3 = \Delta G_4 (*OH) - \Delta G(*O)$$

$$\Delta G_4 = -\Delta G_4 (*OH)$$

The Gibbs free energy value for each step at a given potential is calculated by the following equation:

$$G_1 = 4.92$$

$$G_2 = G_1 + \Delta G_1$$

$$G_3 = G_2 + \Delta G_2$$

$$G_4 = G_3 + \Delta G_3$$

$$G_5 = G_4 + \Delta G_3$$

The oxygen adsorption energy i.e.  $E_{\text{ads}}(\text{O})$  was calculated as:

$$E_{\text{ads}}(\text{O}) = E_{\text{total}} - E(\text{O}) - E^*$$

$E_{\text{total}}$ ,  $E(\text{O})$ , and  $E^*$  represent the energies of the oxygen adsorption system, O atoms, and without oxygen adsorption system, respectively.

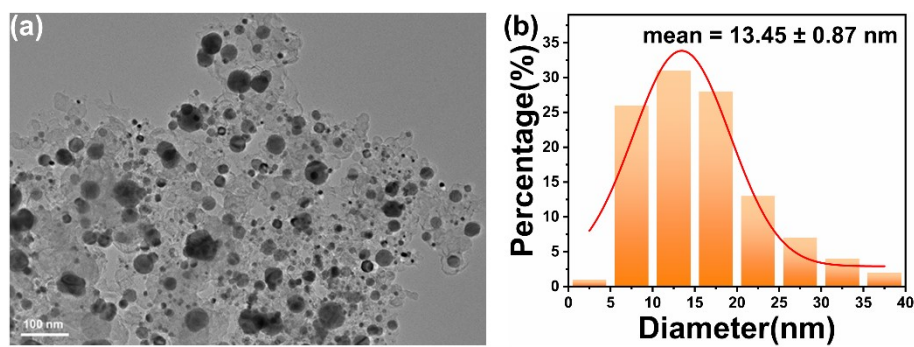

**Fig. S1** (a) TEM images of annealed nanoparticles without urea protection. (b) The statistical distribution of the particle size.

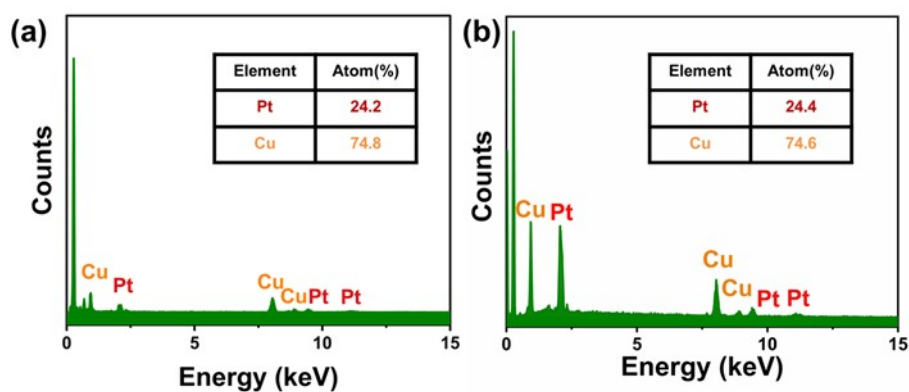

**Fig. S2** EDS spectrum of L1<sub>2</sub>-PtCu<sub>3</sub>/C. Before (a) and after (b) electrochemical activation.

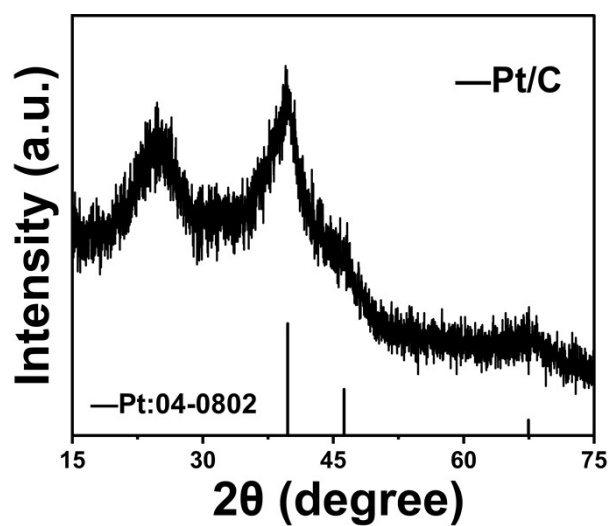

Fig. S3 XRD spectrum of Pt/C.

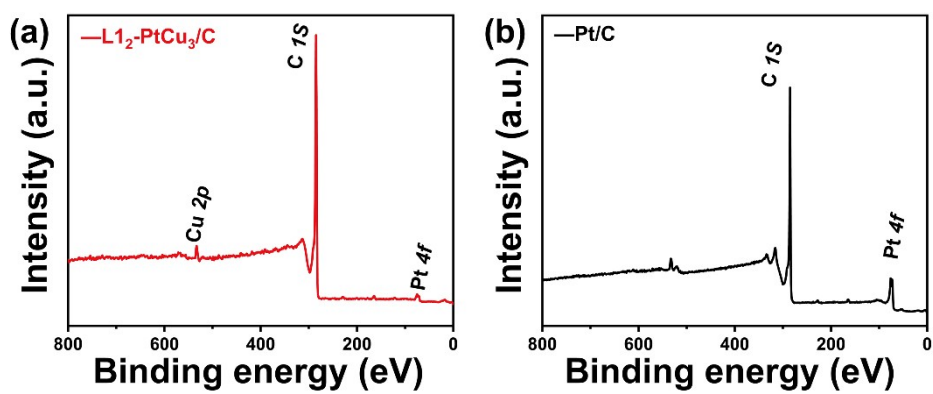

Fig. S4 XPS full survey spectra of L1<sub>2</sub>-PtCu<sub>3</sub>/C (a) and Pt/C (b).

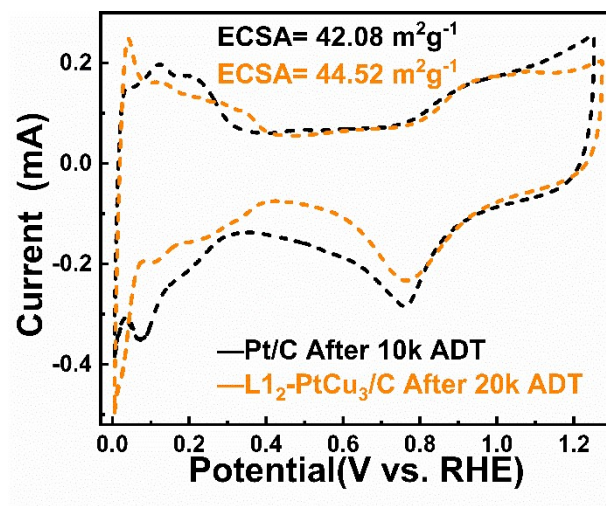

**Fig. S5** Comparison of electrochemically active areas (ECSA) of L1<sub>2</sub>-PtCu<sub>3</sub>/C and Pt/C after different ADT cycles.

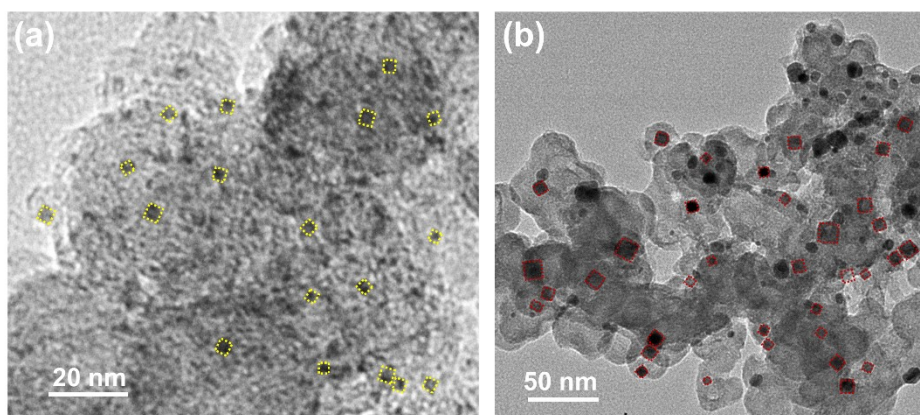

**Fig. S6** TEM images of L1<sub>2</sub>-PtCu<sub>3</sub>/C before (a) and after (b) 20k ADT.

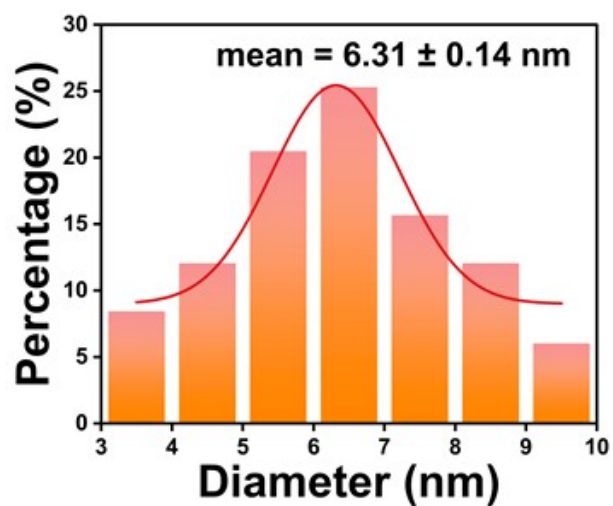

**Fig. S7** Information on the particle size distribution of L1<sub>2</sub>-PtCu<sub>3</sub>/C after 20k ADT.

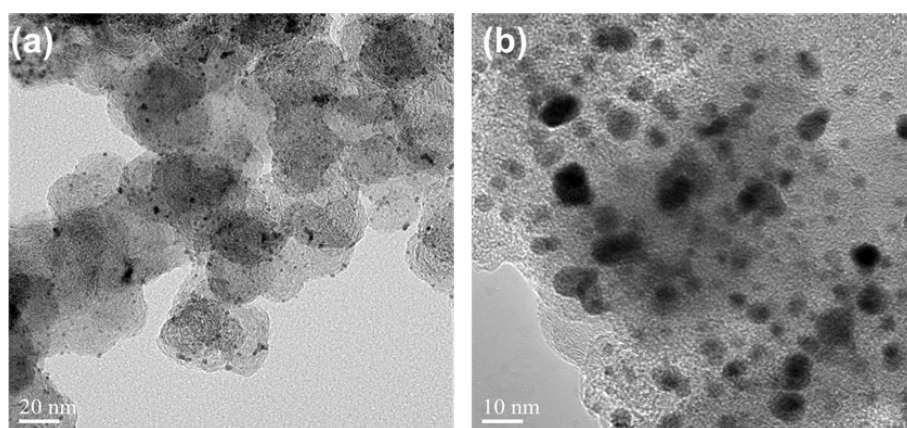

**Fig. S8** TEM images of Pt/C before (a) and after (b) 10k ADT.

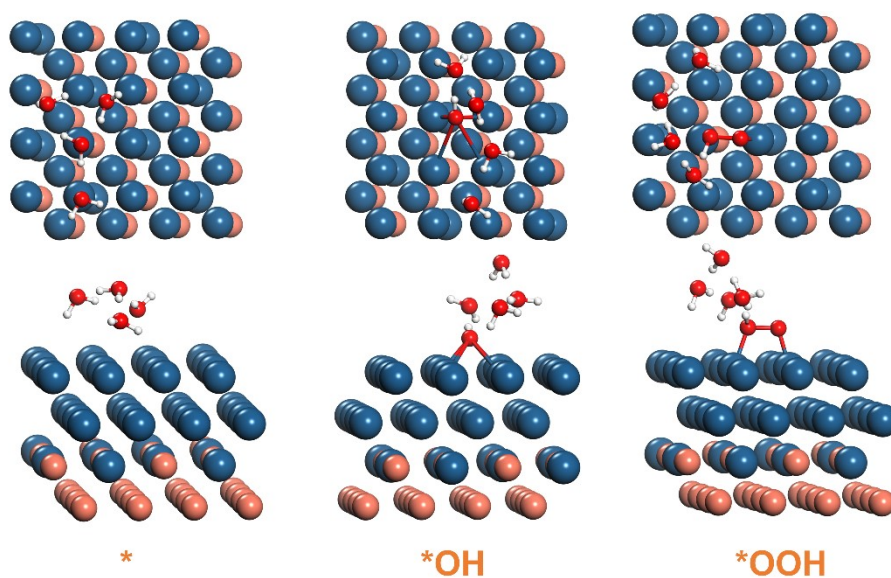

**Fig. S9** Main (bottom) and top (top) views of the four electron reaction path atomic model of  $L1_2\text{-PtCu}_3$ , from left to right, is \*, \*OH and \*OOH.

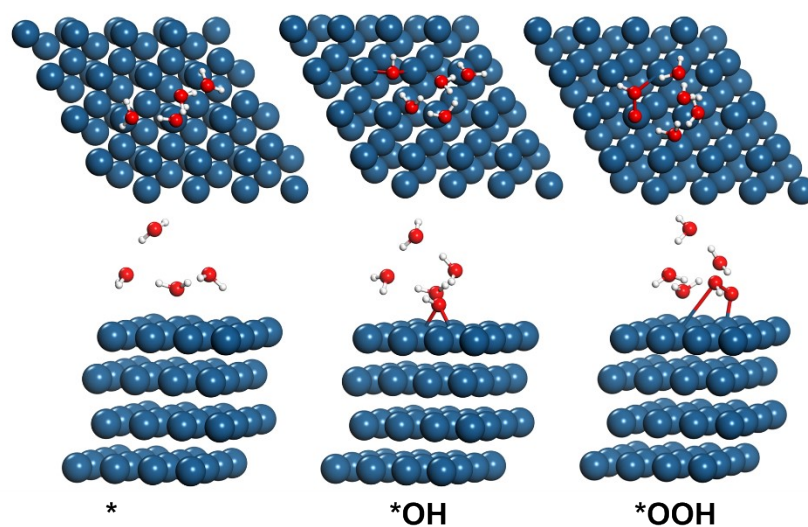

**Fig. S10** Main (bottom) and top (top) views of the four electron reaction path atomic model of Pt (111), from left to right, is \*, \*OH and \*OOH.

**Table S1.** Metal content of  $L1_2\text{-PtCu}_3/\text{C}$  measured using ICP-AES

|                    | before 20k ADT |        | after 20k ADT |        |
|--------------------|----------------|--------|---------------|--------|
| Pt mass dispersion | 17.43%         |        | 16.08%        |        |
|                    | wt%            | at%    | wt%           | at%    |
| Pt                 | 49.44%         | 24.15% | 50.82%        | 25.18% |
| Cu                 | 50.56%         | 75.85% | 49.18%        | 74.84% |
| Pt-Cu ratio        | 1:3.14         |        | 1:2.97        |        |

The mass fraction of Pt before and after the 10k cycles for Pt/C are 20.02% and 17.78%.

**Table S2.** Rietveld refined fitting results of L1<sub>2</sub>-PtCu<sub>3</sub>/C and Pt/C

|                                       | XRD size<br>(nm) | lattice<br>constant | Lattice<br>shrinkage (%) | lattice<br>volume | R <sub>wp</sub> (%) | GOF  | Space<br>group |
|---------------------------------------|------------------|---------------------|--------------------------|-------------------|---------------------|------|----------------|
| L1 <sub>2</sub> -PtCu <sub>3</sub> /C | 6.42             | 3.70                | -4.14                    | 50.7              | 8.54                | 1.13 | Pm-3m (221)    |
| Pt/C                                  | /                | 3.92                | /                        | 60.2              | 7.62                | 1.01 | Fm-3m (225)    |

The lattice mismatch is calculated by the equation as follows:

$$\varepsilon = \frac{d_{L1_2-PtCu_3} - d_{Pt(bulk)}}{d_{Pt(bulk)}} = \frac{0.266 - 0.2775}{0.2755} = -4.14\%$$

**Table S3.** The Order Degree of XRD Refinement of L1<sub>2</sub>-PtCu<sub>3</sub>/C

|                                       | (100)/(111) | (100) order<br>degree | (110)/(111) | (110) order<br>degree |
|---------------------------------------|-------------|-----------------------|-------------|-----------------------|
| Standard Card                         | 0.380       | 1                     | 0.288       | 1                     |
| L1 <sub>2</sub> -PtCu <sub>3</sub> /C | 0.364       | 0.96                  | 0.181       | 0.63                  |

The order degree is calculated by the ratio of the peak heights between the ordered superlattice characteristic peaks and the main peaks to the corresponding peaks in the standard card.<sup>4</sup>

**Table S4.** Pt 4f peak splitting results for Pt/C and PtCu<sub>3</sub>/C

|       |                                    | Pt/C     | PtCu <sub>3</sub> /C |
|-------|------------------------------------|----------|----------------------|
| Pt 4f | Pt 4f <sub>7/2</sub>               | 71.91 eV | 71.20 eV             |
|       | Pt <sup>2+</sup> 4f <sub>7/2</sub> | 72.79 eV | 71.75 eV             |
|       | Pt 4f <sub>5/2</sub>               | 75.42 eV | 74.80 eV             |
|       | Pt <sup>2+</sup> 4f <sub>5/2</sub> | 76.91 eV | 77.25 eV             |

**Table S5.** Comparison of intermetallic catalysts between particle size and ECSA

| Catalyst                                | annealing temperature<br>(°C) | TEM size<br>(nm) | ECSA<br>(m <sup>2</sup> g <sup>-1</sup> ) | Reference    |
|-----------------------------------------|-------------------------------|------------------|-------------------------------------------|--------------|
| L1 <sub>2</sub> -PtCu <sub>3</sub> /C   | 850                           | 3.98             | 50.24                                     | This work    |
| Pt <sub>1</sub> Co <sub>1</sub> -IMC@Pt | 700                           | 5.30             | 43.50                                     | <sup>5</sup> |
| fct-PtMn/C                              | 800                           | 4.30             | 28.90                                     | <sup>6</sup> |
| Pt <sub>1</sub> Fe <sub>1</sub> -IMC/C  | 700                           | 4.10             | 43.00                                     | <sup>4</sup> |
| O-PtCuNF/C                              | 300                           | 28.80            | 35.10                                     | <sup>7</sup> |
| Pt <sub>3</sub> Mn<br>intermetallic/C   | 700                           | 4.23             | 44.00                                     | <sup>8</sup> |
| L1 <sub>0</sub> -CoPt                   | 700                           | 5.00             | /                                         | <sup>9</sup> |

**Table S6.** Comparison of RDE tests at 0.9 V vs. RHE based on intermetallic catalysts in this work and in other studies.

| Catalyst                                | Specific activity<br>(mA cm <sup>-2</sup> ) | Mass activity<br>(A mg <sub>Pt</sub> <sup>-1</sup> ) | Reference |
|-----------------------------------------|---------------------------------------------|------------------------------------------------------|-----------|
| L1 <sub>2</sub> -PtCu <sub>3</sub> /C   | 2.63                                        | 1.33                                                 | This work |
| Pt <sub>1</sub> Co <sub>1</sub> -IMC@Pt | 1.1                                         | 0.53                                                 | 5         |
| fct-PtMn/C                              | 1.43                                        | 0.41                                                 | 6         |
| Pt <sub>1</sub> Fe <sub>1</sub> -IMC/C  | 0.99                                        | 0.45                                                 | 4         |
| Pt <sub>3</sub> Mn intermetallic/C      | 1.877                                       | 0.386                                                | 8         |
| L1 <sub>0</sub> -CoPt                   | 1.87                                        | 0.68                                                 | 9         |
| PtCo <sub>3</sub> -H600                 | 1.74                                        | 0.74                                                 | 10        |
| Pt <sub>3</sub> Fe/C                    | 1.364                                       | 0.454                                                | 11        |
| L1 <sub>0</sub> -PtZn/C <sub>MOF</sub>  | 1.13                                        | 0.926                                                | 12        |
| Int-PtCuN/KB                            | 1.18                                        | 1.15                                                 | 13        |

**Table S7.** Electrochemical performance index depletion before and after accelerated durability testing of Pt/C and L<sub>12</sub>-PtCu<sub>3</sub>/C. The specific activity and mass activity (MA) were calculated at 0.9V vs. RHE.

| Catalyst                             |            | ECSA                                         | Specific activity   | Mass activity                    | MA loss   |
|--------------------------------------|------------|----------------------------------------------|---------------------|----------------------------------|-----------|
|                                      |            | m <sup>2</sup> g <sub>Pt</sub> <sup>-1</sup> | mA cm <sup>-2</sup> | A mg <sub>Pt</sub> <sup>-1</sup> | after ADT |
| L <sub>12</sub> PtCu <sub>3</sub> /C | Intial     | 50.24                                        | 2.63                | 1.33                             | /         |
|                                      | 20k cycles | 44.52                                        | 2.18                | 0.97                             | 27.1%     |
| Pt/C                                 | Intial     | 71.40                                        | 0.16                | 0.11                             | /         |
|                                      | 10k cycles | 42.08                                        | 0.15                | 0.063                            | 42.7%     |

**Table S8.** Comparison of retention of MA between the present work and other electrocatalysts at different adt turn numbers.

| Catalyst                              | Retention of MA (%) | Cycles (k) | Reference |
|---------------------------------------|---------------------|------------|-----------|
| L1 <sub>2</sub> -PtCu <sub>3</sub> /C | 72.2                | 20         | This work |
| A-MS-Pt <sub>1.5</sub> Ni             | 90.8                | 5          | 14        |
| PtCo-1000/C                           | 85.2                | 5          | 15        |
| Pt <sub>3</sub> Mn intermetallic/C    | 71.5                | 10         | 8         |
| PtFe-H/Pt                             | 77.0                | 10         | 16        |
| PtZnCu-F-NC                           | 70.0                | 10         | 17        |
| Pt-Ni PNCs                            | 64.1                | 10         | 18        |
| Pt <sub>2.4</sub> Ni/C                | 40.0                | 10         | 19        |
| Pd-Se NPs/C                           | 71.8                | 15         | 20        |
| PtPd                                  | 74.4                | 15         | 21        |
| PtCuNi-W/C                            | 65.9                | 20         | 22        |
| PtCo NFs                              | 33.4                | 30         | 23        |
| Ga-doped PtNi                         | 39.1                | 30         | 24        |

**Table S9.** The Gibbs free energy value of L1<sub>2</sub>-PtCu<sub>3</sub> and Pt (111)

|                                    | U vs. RHE | G1   | G2    | G3    | G4    | G5   |
|------------------------------------|-----------|------|-------|-------|-------|------|
|                                    | (V)       | (eV) | (eV)  | (eV)  | (eV)  | (eV) |
| L1 <sub>2</sub> -PtCu <sub>3</sub> | U=0       | 4.92 | 3.44  | 2.07  | 0.95  | 0    |
|                                    | U=1.23    | 0    | -0.22 | -0.39 | -0.28 | 0    |
| Pt (111)                           | U=0       | 4.92 | 3.74  | 1.97  | 0.81  | 0    |
|                                    | U=1.23    | 0    | 0.046 | -0.49 | -0.42 | 0    |

**Table S10.** Lattice constants and lattice shrinkage of L1<sub>2</sub>-PtCu<sub>3</sub> based on DFT calculations.

| Catalyst                           | a <sub>[100]</sub> /a <sub>Pt</sub> | lattice contraction | a <sub>[010]</sub> /a <sub>Pt</sub> | lattice contraction | a <sub>[001]</sub> /a <sub>Pt</sub> | lattice contraction |
|------------------------------------|-------------------------------------|---------------------|-------------------------------------|---------------------|-------------------------------------|---------------------|
| L1 <sub>2</sub> -PtCu <sub>3</sub> | 0.942                               | 5.72%               | 0.942                               | 5.72%               | 0.942                               | 5.72%               |

## Reference

1. C. H. Yao, F. Li, X. Li and D. G. Xia, *J Mater Chem*, 2012, **22**, 16560-16565.
2. A. Kulkarni, S. Siahrostami, A. Patel and J. K. Norskov, *Chem Rev*, 2018, **118**, 2302-2312.
3. Z. Ma, Z. P. Cano, A. P. Yu, Z. W. Chen, G. P. Jiang, X. G. Fu, L. Yang, T. N. Wu, Z. Y. Bai and J. Lu, *Angew Chem Int Edit*, 2020, **59**, 18334-18348.
4. D. C. Lai, Q. Q. Cheng, Y. Zheng, H. Zhao, Y. B. Chen, W. B. Hu, Z. Q. Zou, K. Wen, L. L. Zou and H. Yang, *J Mater Chem A*, 2022, **10**, 16639-16645.
5. Q. Q. Cheng, S. Yang, C. H. Fu, L. L. Zou, Z. Q. Zou, Z. Jiang, J. L. Zhang and H. Yang, *Energ Environ Sci*, 2022, **15**, 278-286.
6. M. Song, F. Li, Q. Zhang, T. Shen, G. Luo, D. Li and D. Wang, *Chem Eng J*, 2023, DOI: 10.1016/j.cej.2023.147287.
7. H. Y. Kim, T. Kwon, Y. Ha, M. Jun, H. Baik, H. Y. Jeong, H. Kim, K. Lee and S. H. Joo, *Nano Lett*, 2020, **20**, 7413-7421.
8. J. Lim, C. Jung, D. Hong, J. Bak, J. Shin, M. Kim, D. Song, C. Lee, J. Lim, H. Lee, H. M. Lee and E. Cho, *J Mater Chem A*, 2022, **10**, 7399-7408.
9. J. Y. Guan, J. Q. Zhang, X. L. Wang, Z. P. Zhang and F. Wang, *Advanced Materials*, 2023, **35**.
10. Z. Wang, X. Yao, Y. Kang, L. Miao, D. Xia and L. Gan, *Advanced Functional Materials*, 2019, **29**.
11. C. Jung, C. Lee, K. Bang, J. Lim, H. Lee, H. J. Ryu, E. Cho and H. M. Lee, *Acs Appl Mater Inter*, 2017, **9**, 31806-31815.
12. T. Zhao, E. G. Luo, Y. Li, X. Wang, C. P. Liu, W. Xing and J. J. Ge, *Sci China Mater*, 2021, **64**, 1671-1678.
13. X. R. Zhao, H. Cheng, L. Song, L. L. Han, R. Zhang, G. H. Kwon, L. Ma, S. N. Ehrlich, A. I. Frenkel, J. Yang, K. Sasaki and H. L. Xin, *Acs Catal*, 2021, **11**, 184-192.
14. F. P. Kong, Z. H. Ren, M. N. Banis, L. Du, X. Zhou, G. Y. Chen, L. Zhang, J. J. Li, S. Z. Wang, M. S. Li, K. Doyle-Davis, Y. L. Ma, R. Y. Li, A. P. Young, L. J. Yang, M. Markiewicz, Y. J. Tong, G. P. Yin, C. Y. Du, J. Luo and X. L. Sun, *Acs Catal*, 2020, **10**, 4205-4214.
15. Y. F. Liao, L. S. Peng, C. L. Wu, Y. G. Yan, H. J. Xie, Y. G. Chen and Y. Wang, *Nano Res*, 2023, **16**, 10708-10709.
16. T. W. Song, M. X. Chen, P. Yin, L. Tong, M. Zuo, S. Q. Chu, P. Chen and H. W. Liang, *Small*, 2022, **18**.
17. T. Liu, F. Sun, M. H. Huang and L. H. Guan, *Acs Appl Energ Mater*, 2022, DOI: 10.1021/acsaem.2c01692.
18. T. Y. Xia, K. Zhao, Y. Q. Zhu, X. Y. Bai, H. Gao, Z. Y. Wang, Y. Gong, M. L. Feng, S. F. Li, Q. Zheng, S. G. Wang, R. M. Wang and H. Z. Guo, *Advanced Materials*, 2023, **35**.
19. G. D. Niu, M. Zhou, X. Yang, J. Park, N. Lu, J. G. Wang, M. J. Kim, L. D. Wang and Y. N. Xia, *Nano Lett*, 2016, **16**, 3850-3857.
20. Z. Y. Yu, S. L. Xu, Y. G. Feng, C. Y. Yang, Q. Yao, Q. Shao, Y. F. Li and X. Q. Huang, *Nano Lett*, 2021, **21**, 3805-3812.
21. R. F. Wu, P. Tsiakaras and P. K. Shen, *Appl Catal B-Environ*, 2019, **251**, 49-56.

22. W. Z. Tu, K. Chen, L. J. Zhu, H. C. Zai, E. Bin, X. X. Ke, C. F. Chen, M. L. Sui, Q. Chen and Y. J. Li, *Advanced Functional Materials*, 2019, **29**.
23. M. Wei, L. Huang, L. B. Li, F. Ai, J. Z. Su and J. K. Wang, *Acs Catal*, 2022, **12**, 6478-6485.
24. J. Lim, H. Shin, M. Kim, H. Lee, K.-S. Lee, Y. Kwon, D. Song, S. Oh, H. Kim and E. Cho, *Nano Lett*, 2018, **18**, 2450-2458.
